# Supplementary material for: Teaching an old dog new tricks: Ti-doped ZnFe2O4 as active material in zinc ion batteries – a proof of concept
Source: Royal Society of Chemistry journal article supplement (doi:10.1039/d4ya00134f), 2024-01-01
Supplement: d4ya00134f12.pdf [file d4ya00134f12.pdf]

### Supporting Information

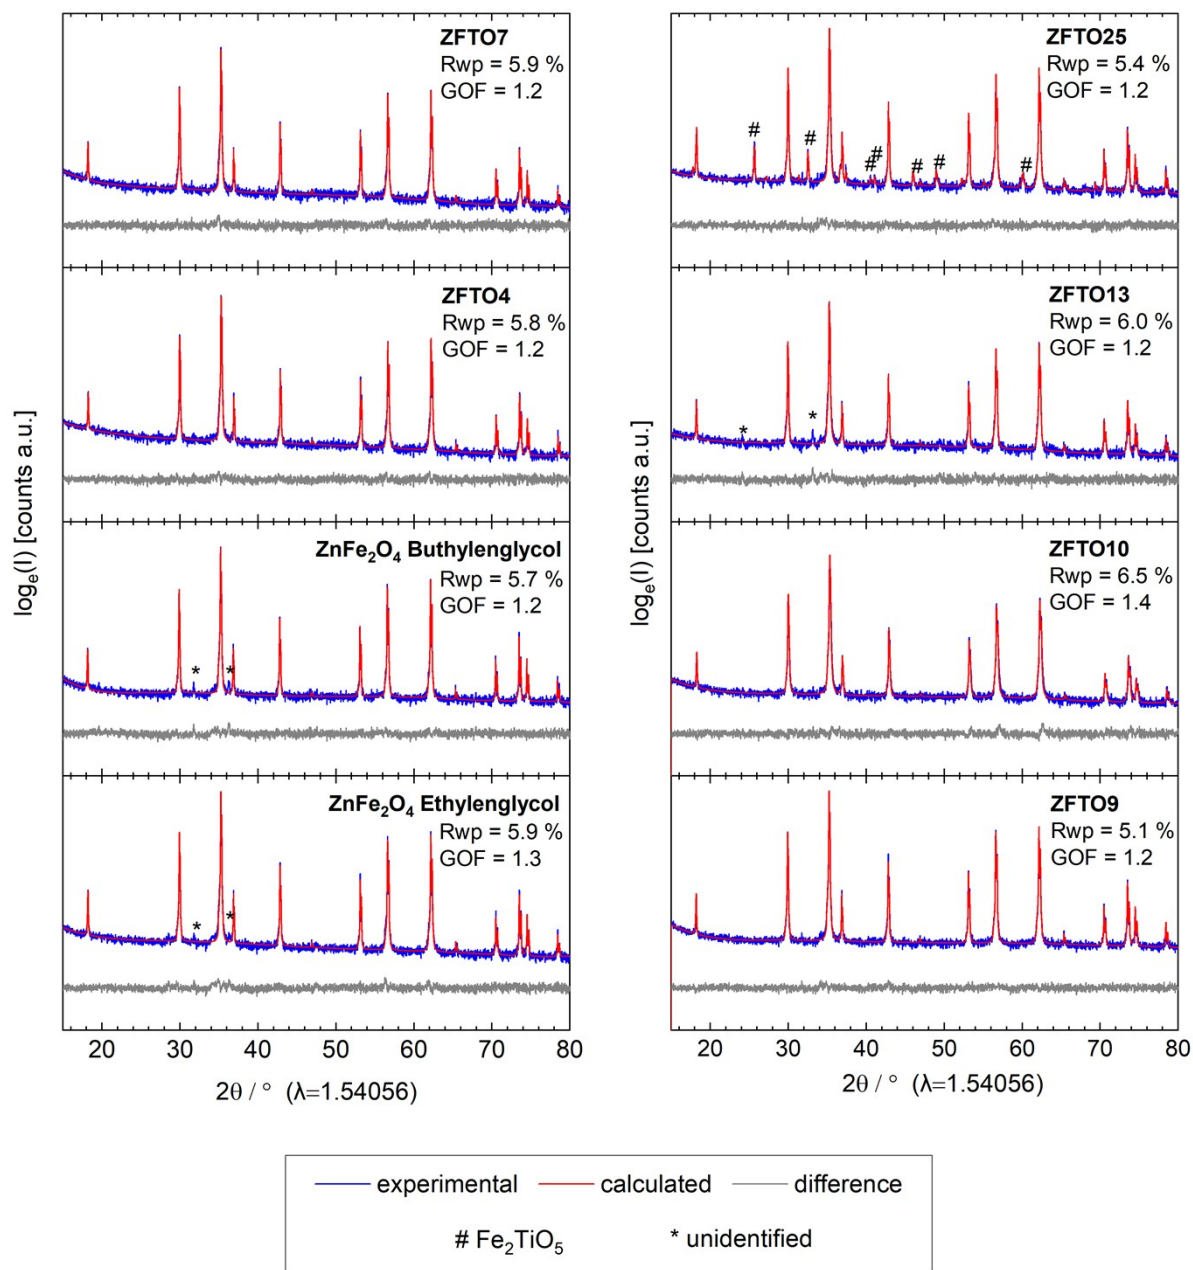

Figure SI 1: Overview of fits against PPXRD data based on the Rietveld method for all samples

Table SI 1: Overview on the results from Rietveld analysis. Spacegroup Fd-3m, structural model  $[Zn]^{8a}[Fe_2]^{16d}O^{32e}$ . Sample ZFTO25 contains 9.76(13) wt.-% of  $Fe_2TiO_5$

| Ti [mol per FU] | Sample name                                        | Lattice parameter, a [Å] | O fractional coordinate at 32e site $x=y=z$ | Atomic distances in tetrahedra (8a – 32e) | Atomic distances in octahedra (8a – 32e) |
|-----------------|----------------------------------------------------|--------------------------|---------------------------------------------|-------------------------------------------|------------------------------------------|
| 0               | ZnFe <sub>2</sub> O <sub>4</sub><br>Butylenglycol. | 8.4420(6)                | 0.26110(28)                                 | 1.990(4)                                  | 2.021(2)                                 |
| 0               | ZnFe <sub>2</sub> O <sub>4</sub><br>Ethylenglycol  | 8.4421(6)                | 0.2612(3)                                   | 1.992(4)                                  | 2.020(1)                                 |
| 0.04            | ZFTO4                                              | 8.4415(6)                | 0.26061(27)                                 | 1.983(4)                                  | 2.0248(19)                               |
| 0.07            | ZFTO7                                              | 8.4402(7)                | 0.26114(32)                                 | 1.995(4)                                  | 2.018(2)                                 |
| 0.09            | ZFTO9                                              | 8.4435(6)                | 0.26043(24)                                 | 1.981(4)                                  | 2.0267(18)                               |
| 0.1             | ZFTO10                                             | 8.43549(13)              | 0.2589(3)                                   | 1.957(4)                                  | 2.036(2)                                 |
| 0.13            | ZFTO13                                             | 8.4443(9)                | 0.26010(27)                                 | 1.976(4)                                  | 2.029(2)                                 |
| 0.25            | ZFTO25                                             | 8.4497(7)                | 0.26022(22)                                 | 1.979(3)                                  | 2.0298(16)                               |

Table SI 2: Molar ratios of the spinel main phase to consider site distributions based on  $[Zn]^{8a}[Fe_2]^{16d}O^{32e}$ . (\*) Sample ZFTO25 contains 9.76(13) wt.-% of  $Fe_2TiO_5$ , thus the spinel main phase stoichiometry was recalculated to  $Zn_{1.15}Fe_{1.74}Ti_{0.11}O_4$

| Ti [mol per FU] | Sample name                                        | Zn/Fe molar ratio | Zn/(Fe+Ti) molar ratio |
|-----------------|----------------------------------------------------|-------------------|------------------------|
| 0               | ZnFe <sub>2</sub> O <sub>4</sub><br>Butylenglycol. | 0.490             | 0.480                  |
| 0               | ZnFe <sub>2</sub> O <sub>4</sub><br>Ethylenglycol  | 0.475             | 0.475                  |
| 0.04            | ZFTO4                                              | 0.475             | 0.475                  |
| 0.07            | ZFTO7                                              | 0.659             | 0.619                  |
| 0.09            | ZFTO9                                              | 0.516             | 0.483                  |
| 0.1             | ZFTO10                                             | 0.508             | 0.482                  |
| 0.13            | ZFTO13                                             | 0.591             | 0.562                  |
| 0.11*           | ZFTO25                                             | 0.503             | 0.485                  |

Table SI 3 Results from density measurements. Density measurements were performed using an Archimedean scale, the measured density was compared to the density from PXRD measurements.

| Sample | Density (% of theoretical density) |
|--------|------------------------------------|
| ZFO    | 82                                 |
| ZFTO4  | 88                                 |
| ZFTO7  | 85                                 |
| ZFTO9  | 90                                 |
| ZFTO10 | 60                                 |
| ZFTO13 | 89                                 |
| ZFTO25 | 90                                 |

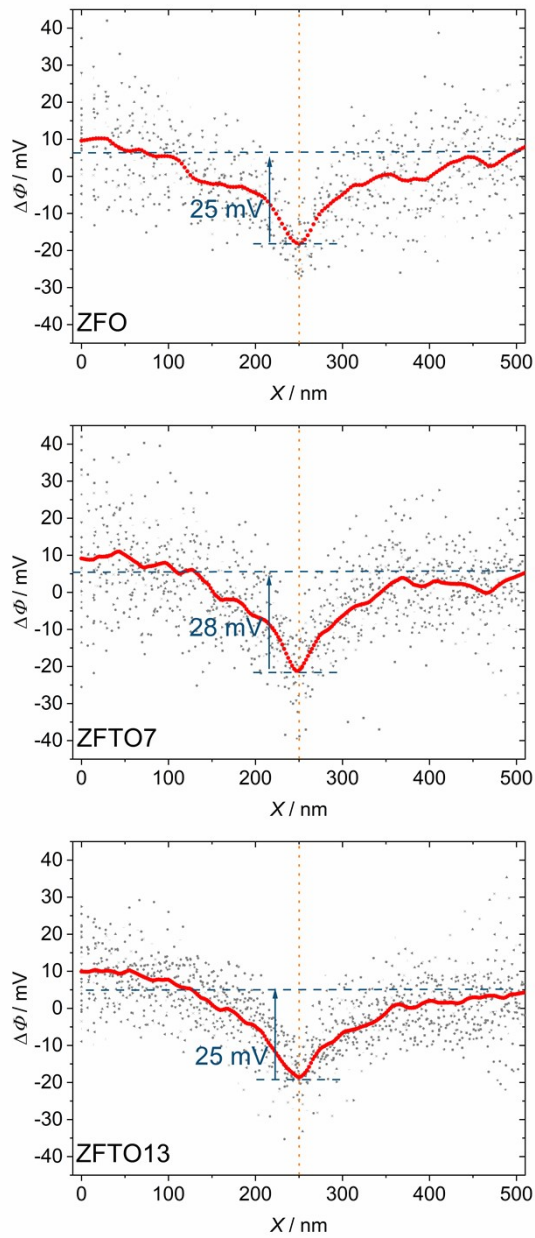

Figure SI 2 Analysis of the surface potential difference at the grain boundaries from KPFM. The crystallographic grain boundary position is indicated by orange dotted line. The average surface potential is shown in red, all measured data (25 different positions for each sample) are shown as grey dots.

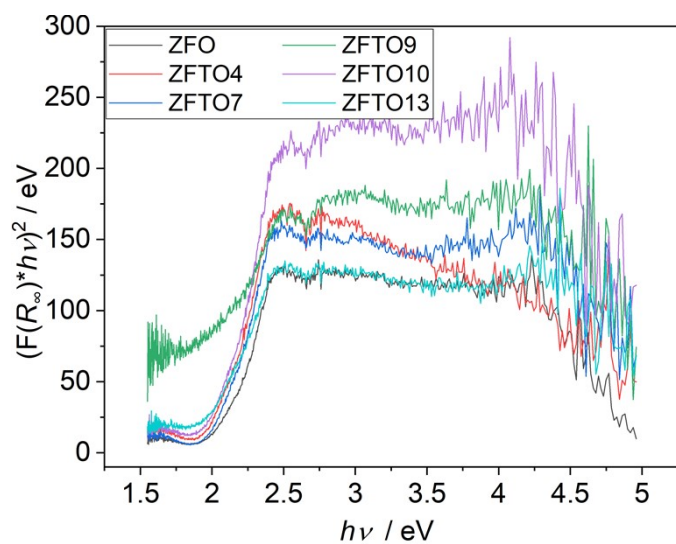

Figure 3 Tauc plot calculated from the optical data.

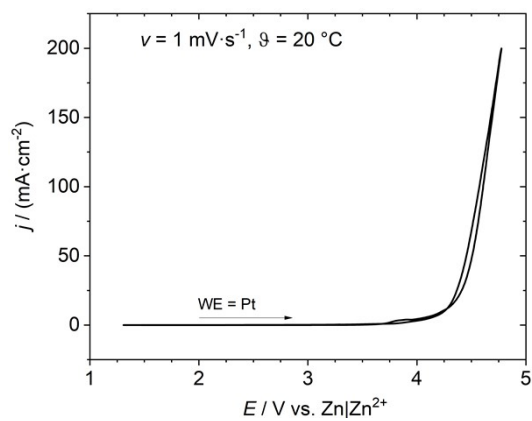

Figure SI 4 Cyclic voltammetry measurement to determine the oxidative stability of organic electrolyte 0.5 M zinc triflate in acetonitrile.

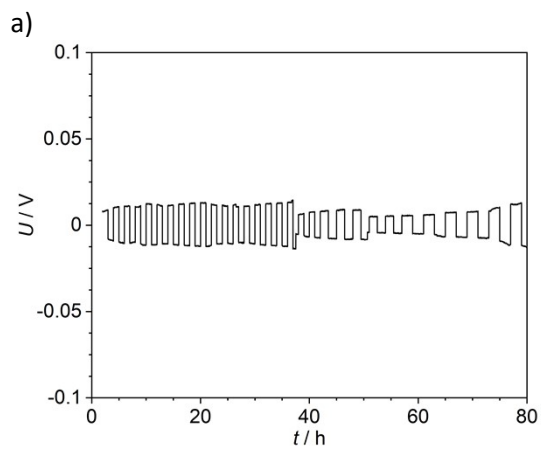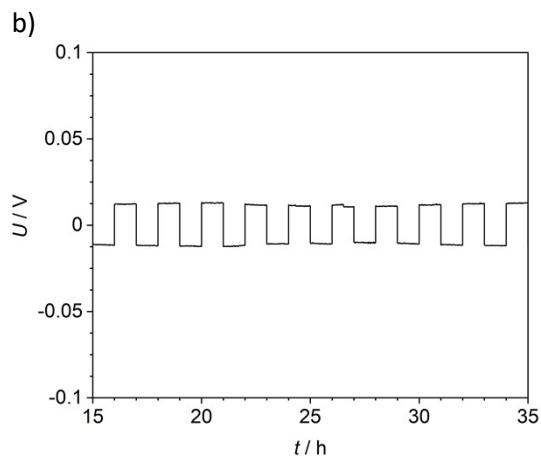

c)

d)

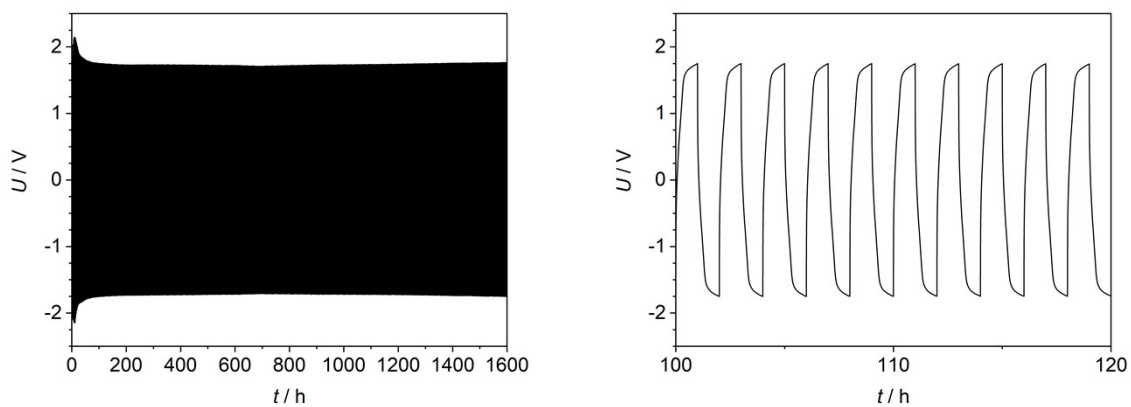

Figure SI 5 Cycling experiment in symmetric cell setup: a) ZFO | ZFO with sintered material at increased current density starting at  $0.1 \text{ mA cm}^{-2}$ ,  $0.15 \text{ mA cm}^{-2}$  to  $0.2 \text{ mA cm}^{-2}$ . b) enlarged area of a) between 15 to 35 h, current density  $0.1 \text{ mA cm}^{-2}$ . c) ZFTO9 | ZFTO9 with calcined material at  $0.1 \text{ mA cm}^{-2}$ , 800 cycles, d) time range between 100-120 h in c) to show shape of individual charge-discharge curves.

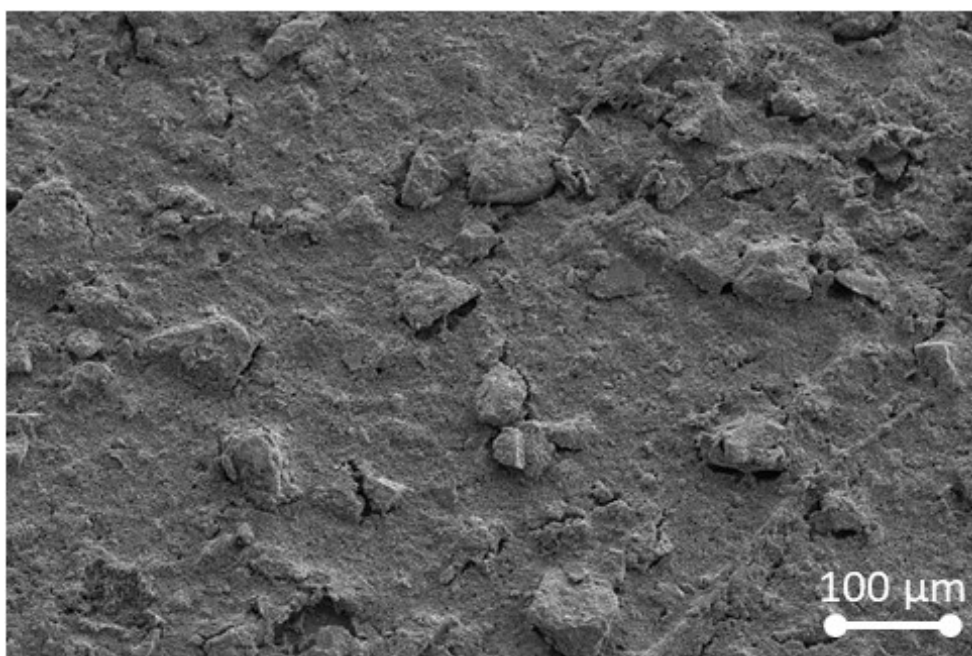

Figure SI 6 Exemplary SEM image of the electrode sheet with undoped  $\text{ZnFe}_2\text{O}_4$ , showing very large particle sizes. The other electrode sheets showed a similar particle size distribution.
