# Supplementary figures and images for: Teaching an old dog new tricks: Ti-doped ZnFe2O4 as active material in zinc ion batteries – a proof of concept
Source: Royal Society of Chemistry journal article supplement (doi:10.1039/d4ya00134f), 2024-01-01

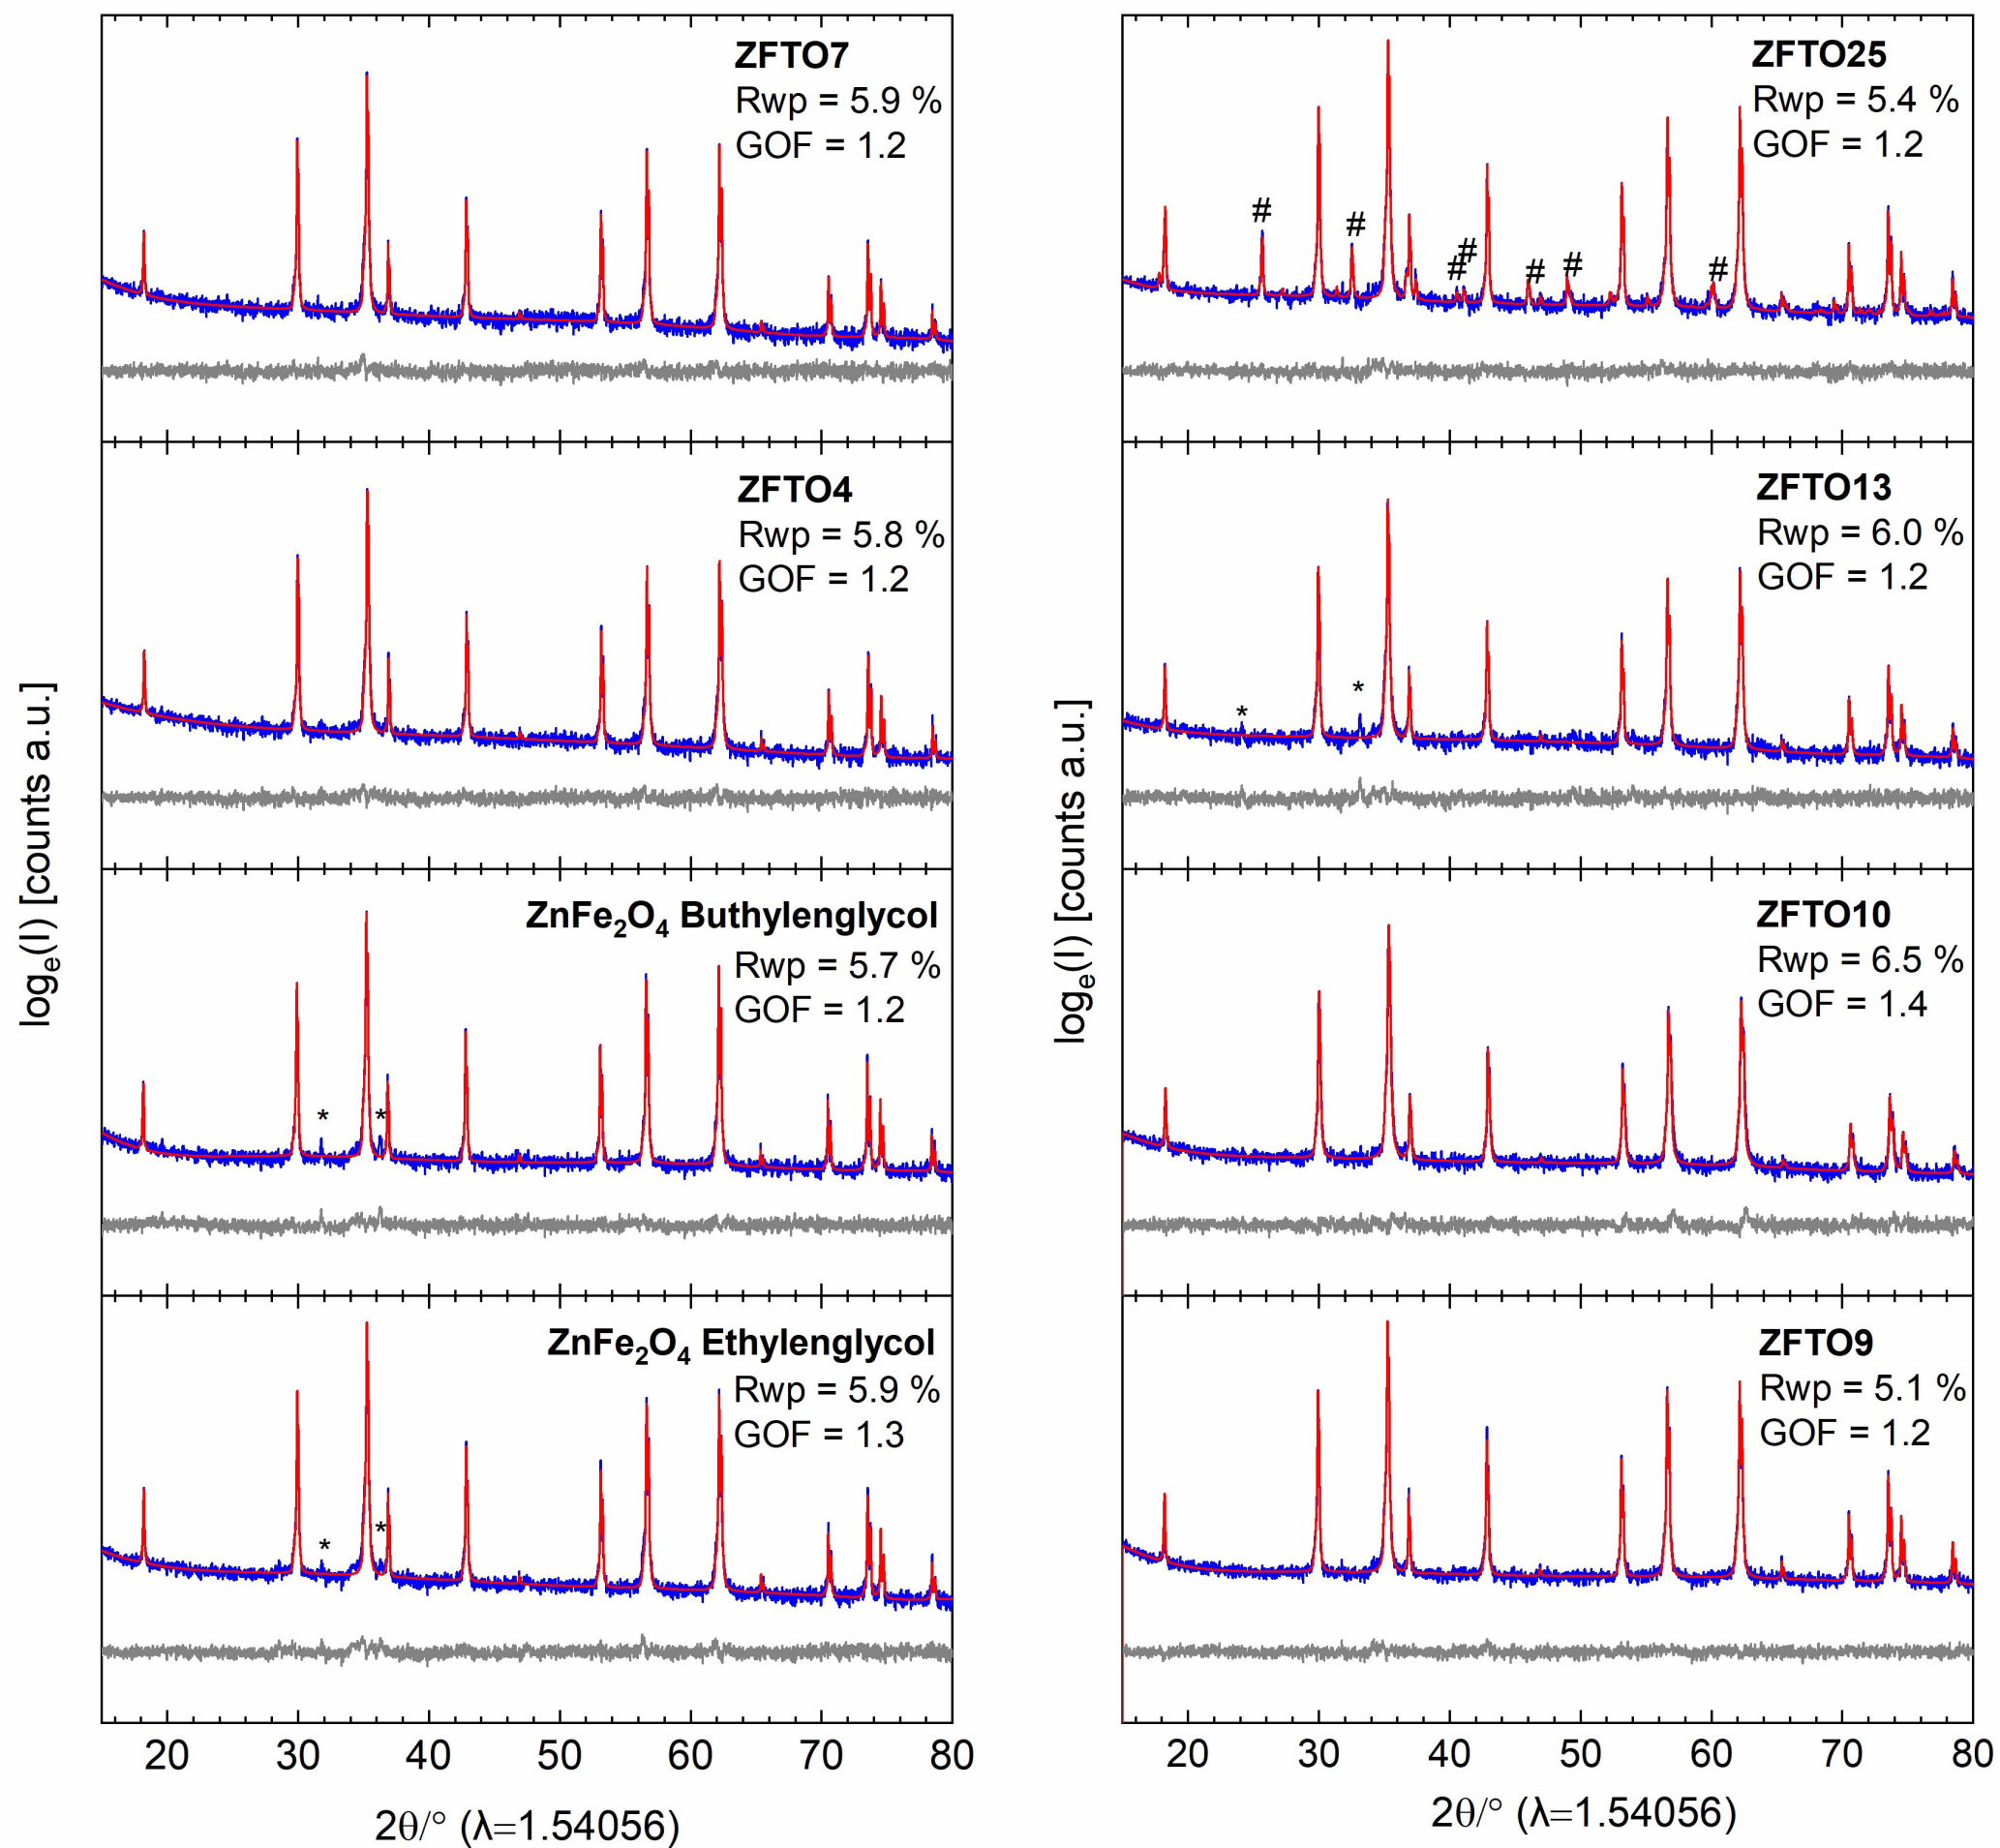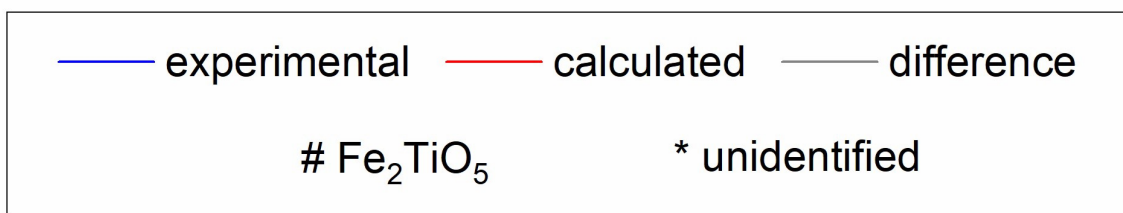

Supplement: d4ya00134f1.pdf [file d4ya00134f1.pdf]

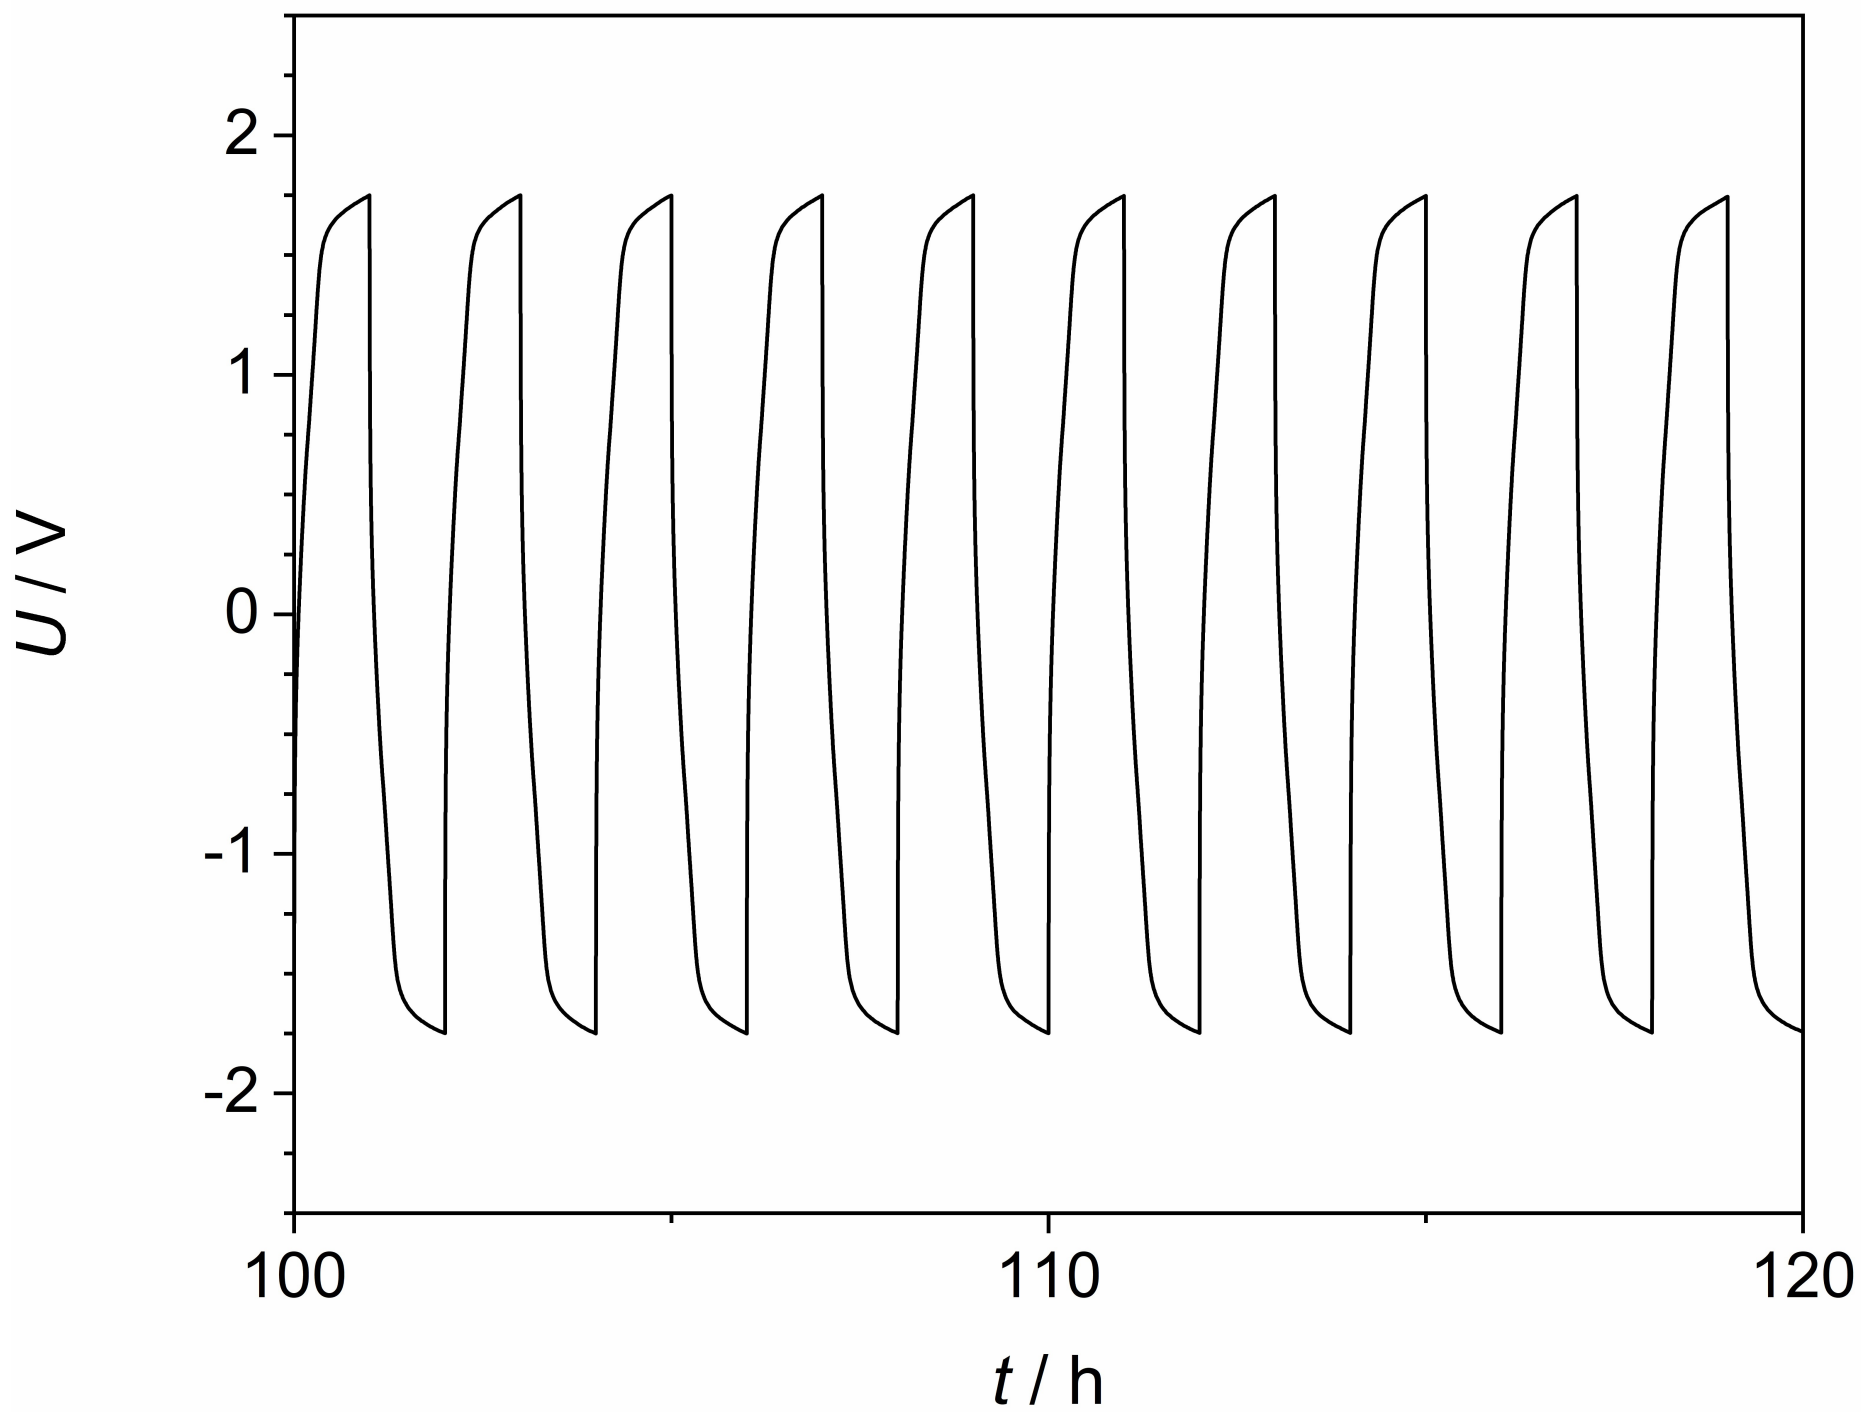

Supplement: d4ya00134f10.pdf [file d4ya00134f10.pdf]

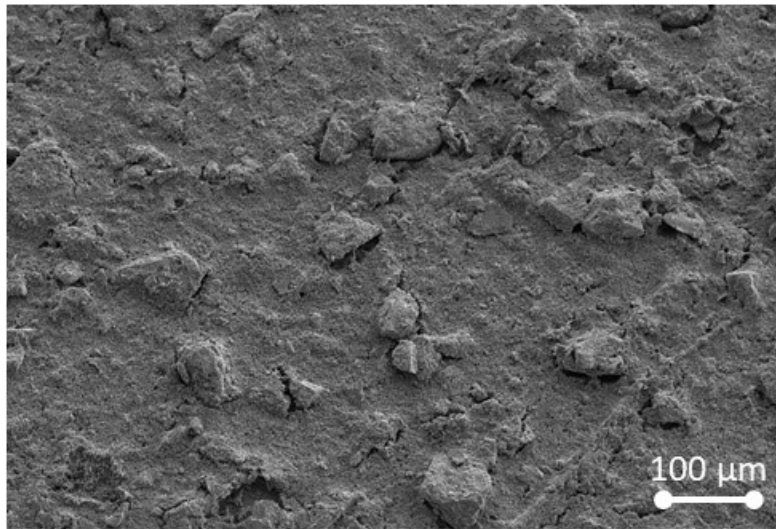

Supplement: d4ya00134f11.pdf [file d4ya00134f11.pdf]

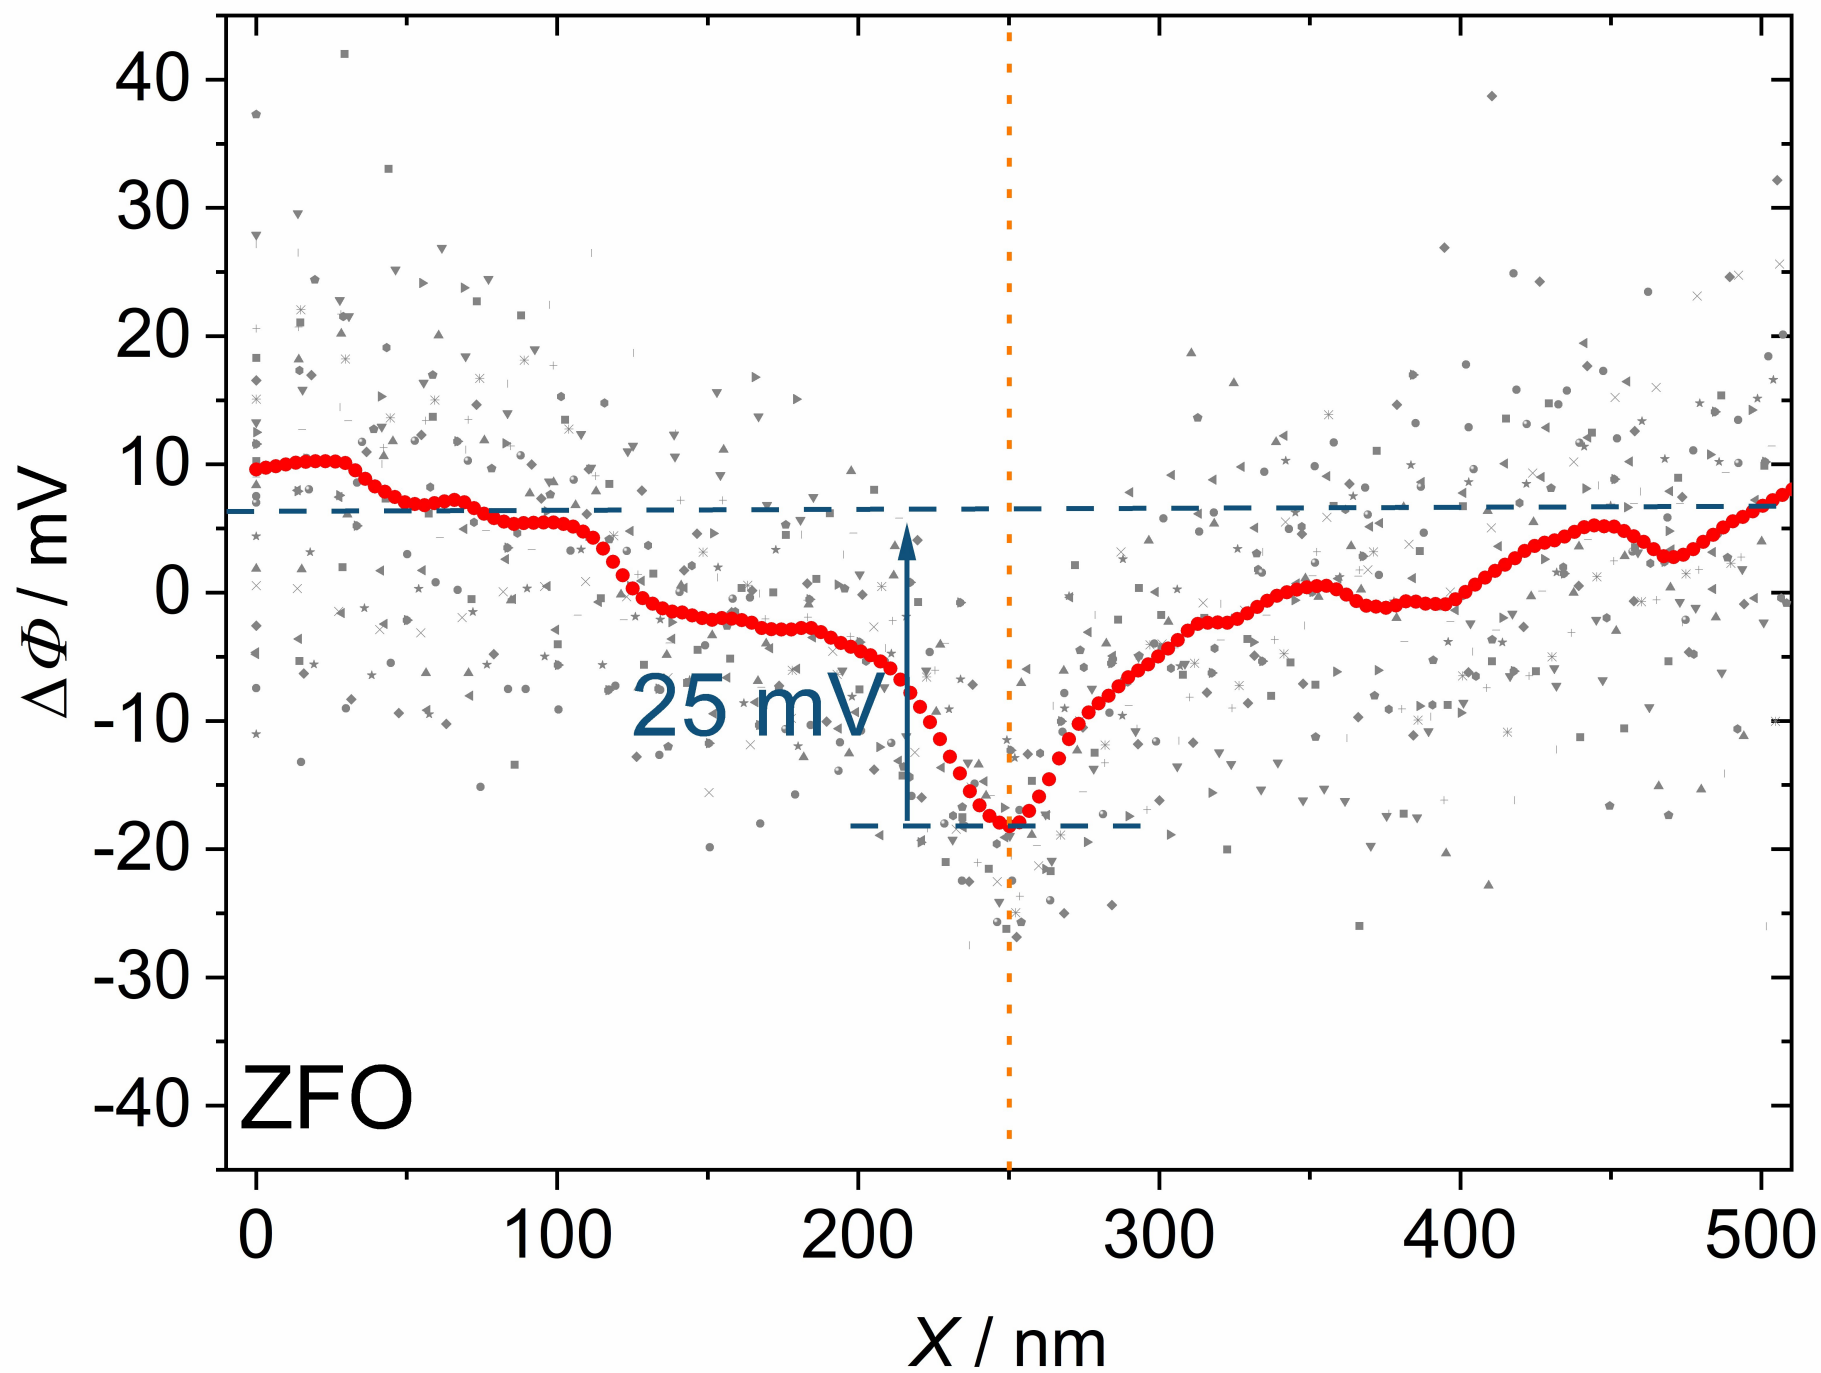

Supplement: d4ya00134f2.pdf [file d4ya00134f2.pdf]

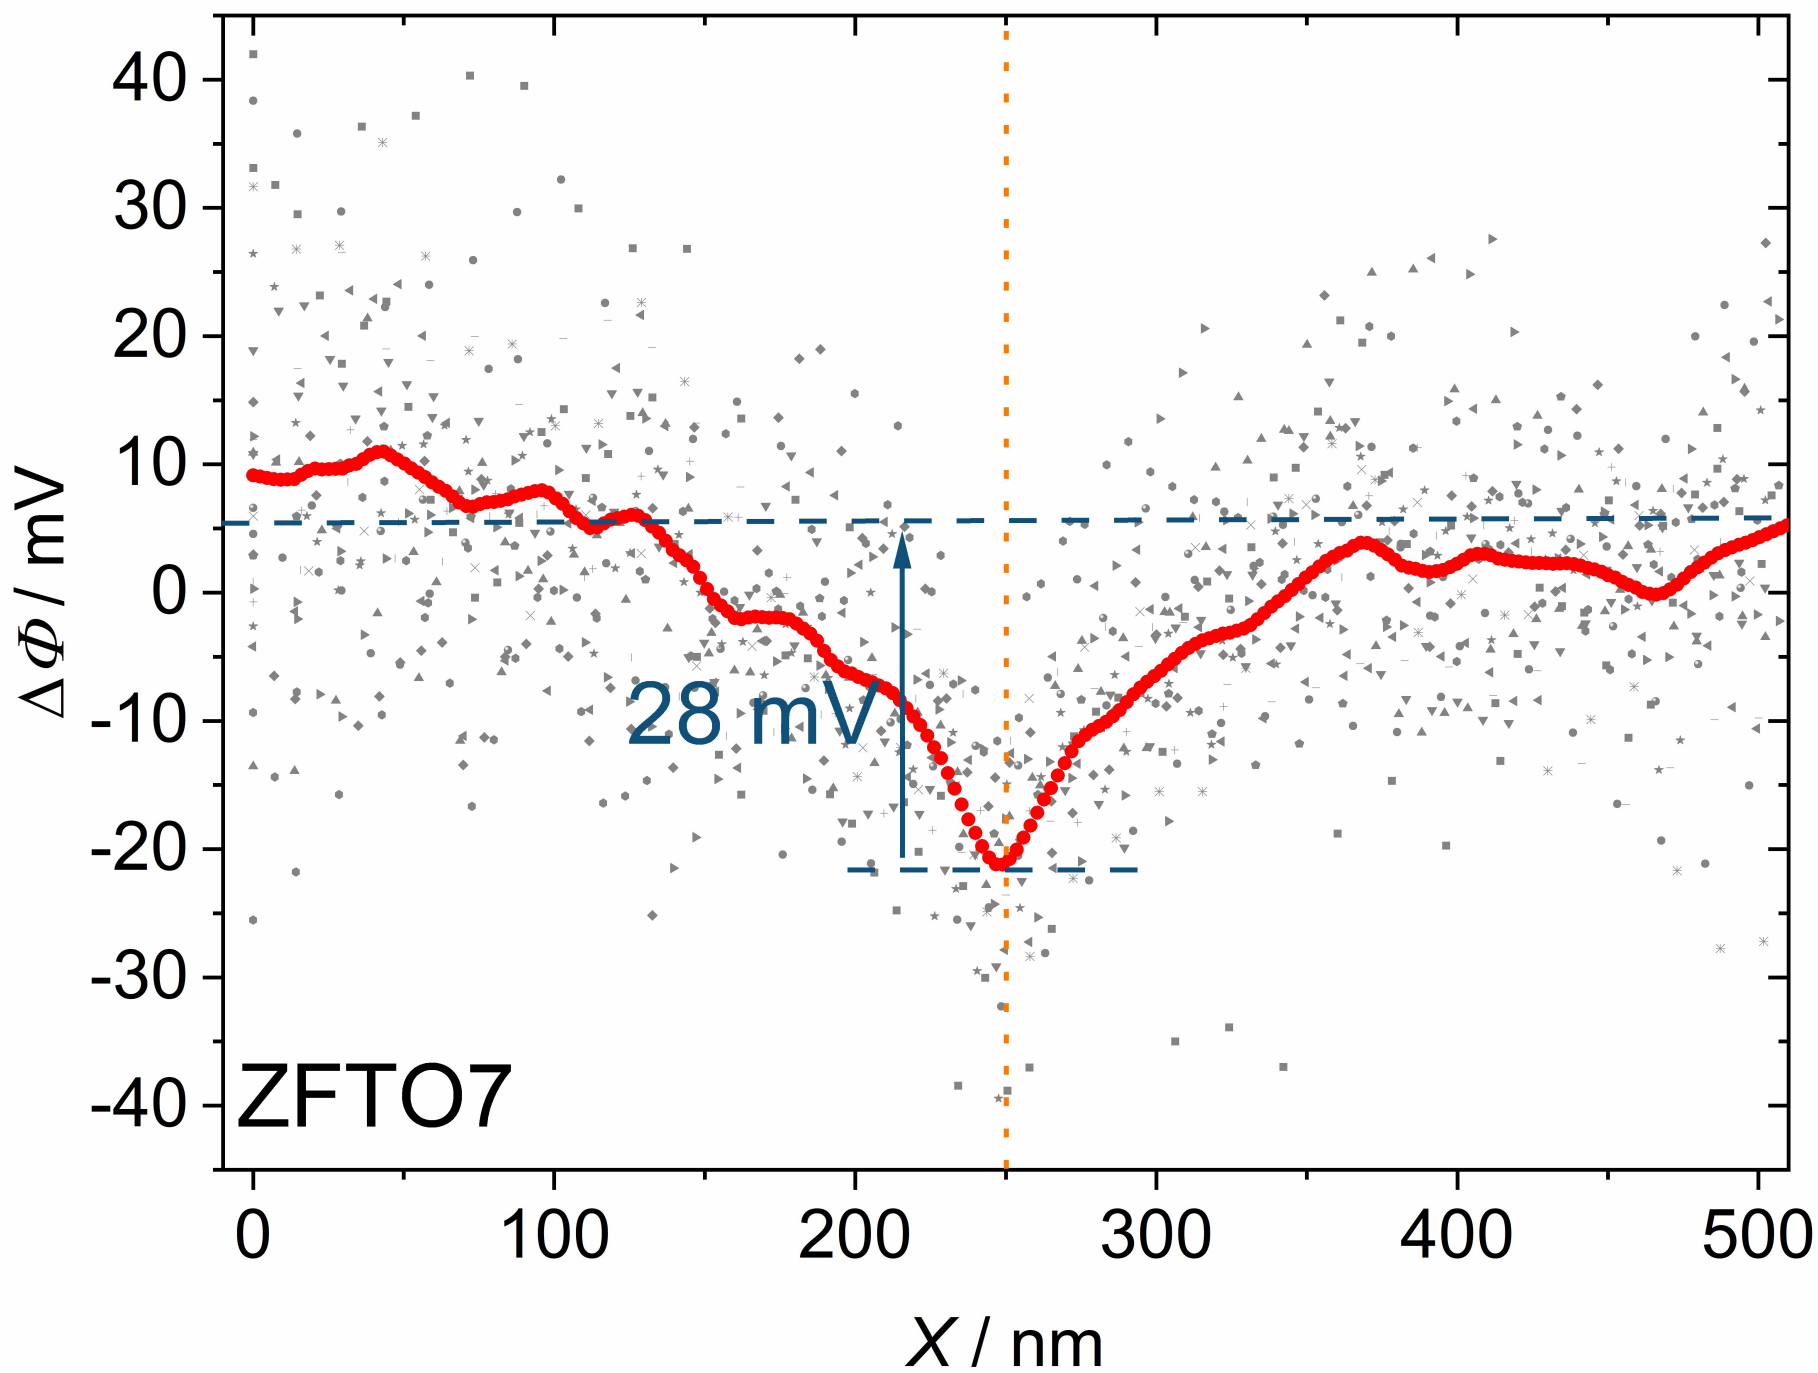

Supplement: d4ya00134f3.pdf [file d4ya00134f3.pdf]

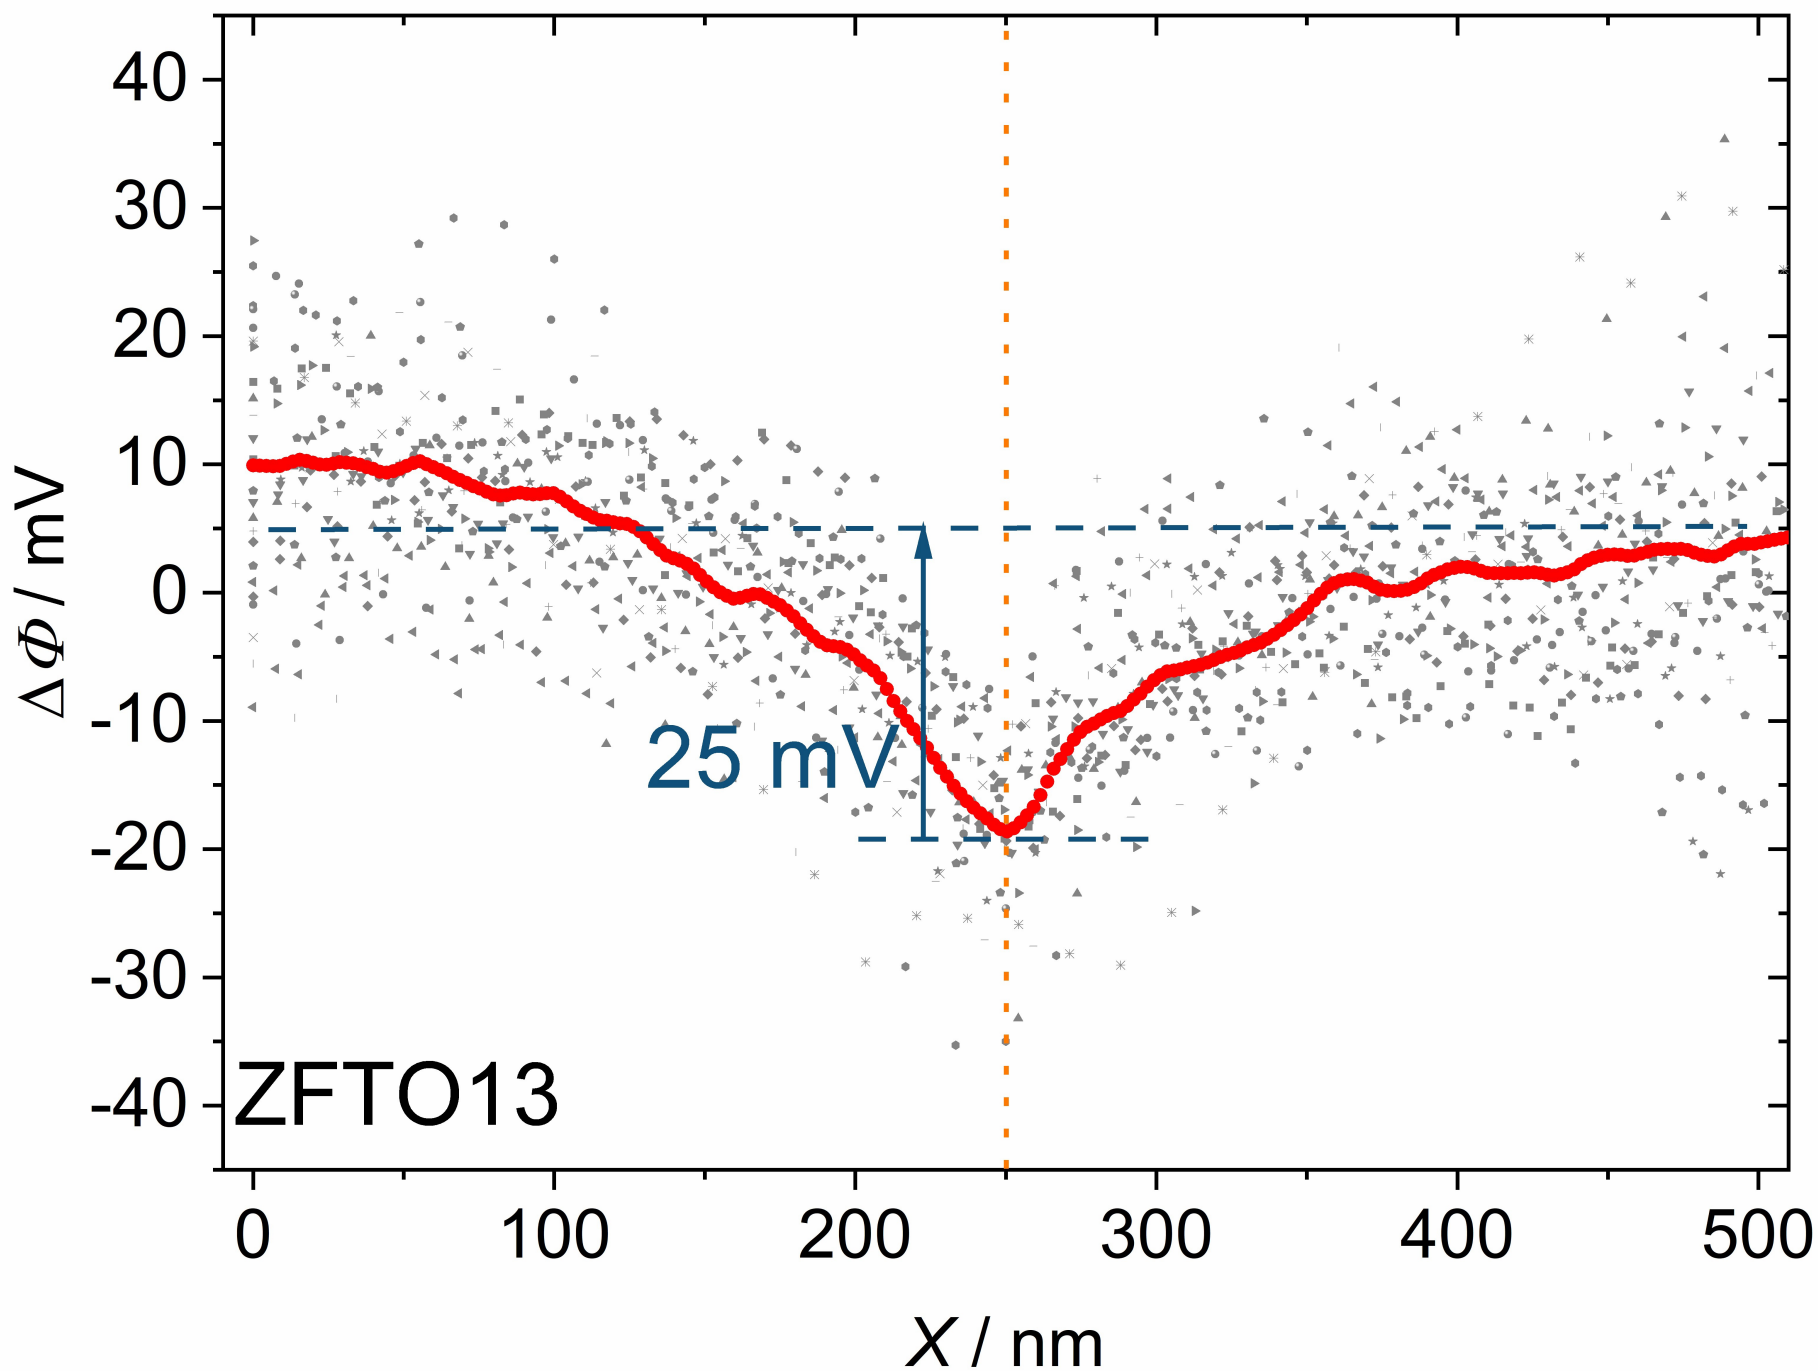

Supplement: d4ya00134f4.pdf [file d4ya00134f4.pdf]

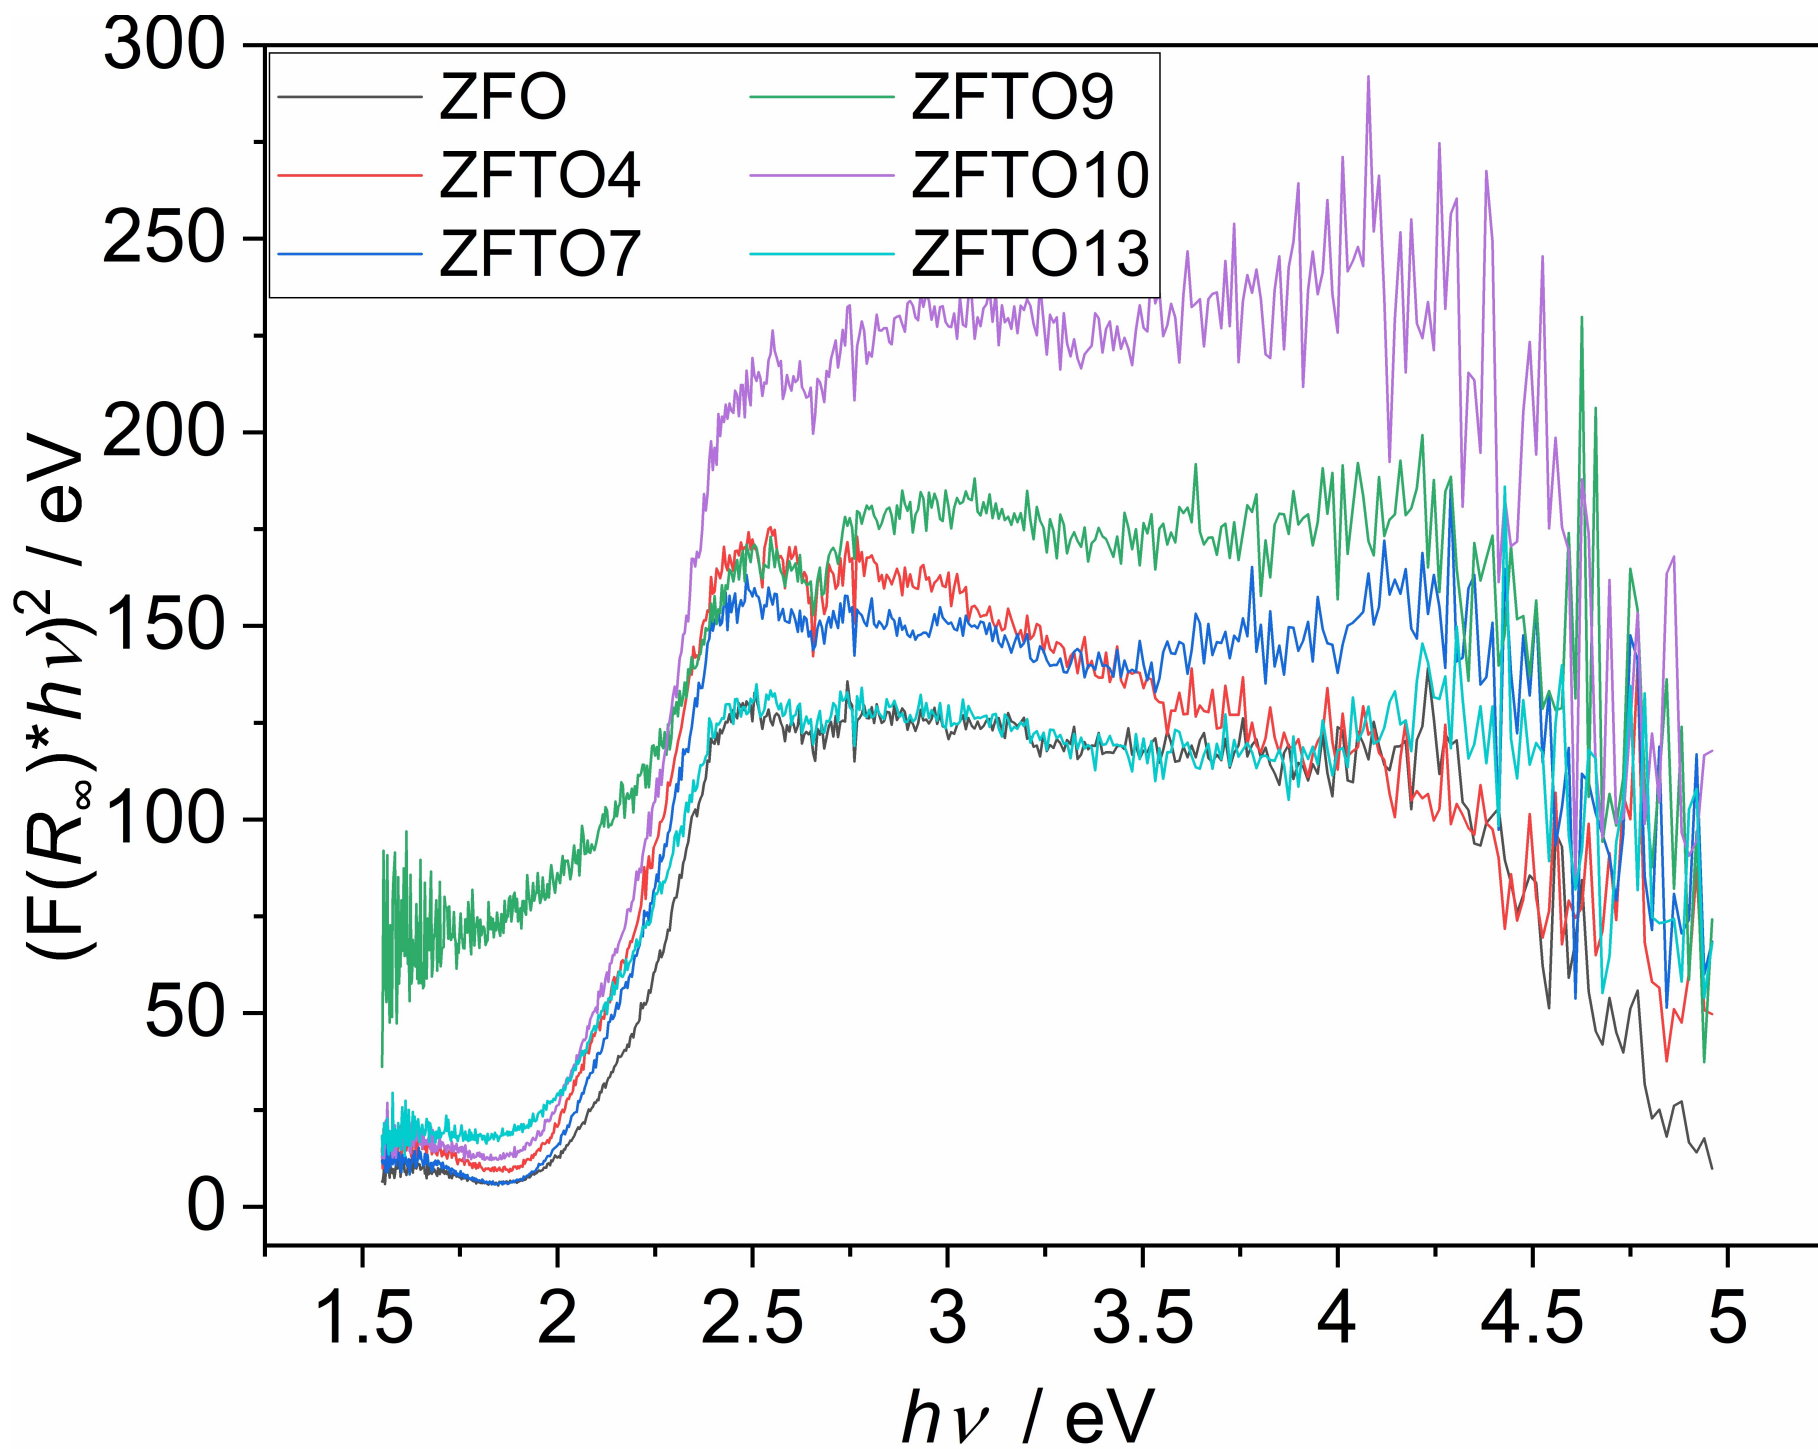

Supplement: d4ya00134f5.pdf [file d4ya00134f5.pdf]

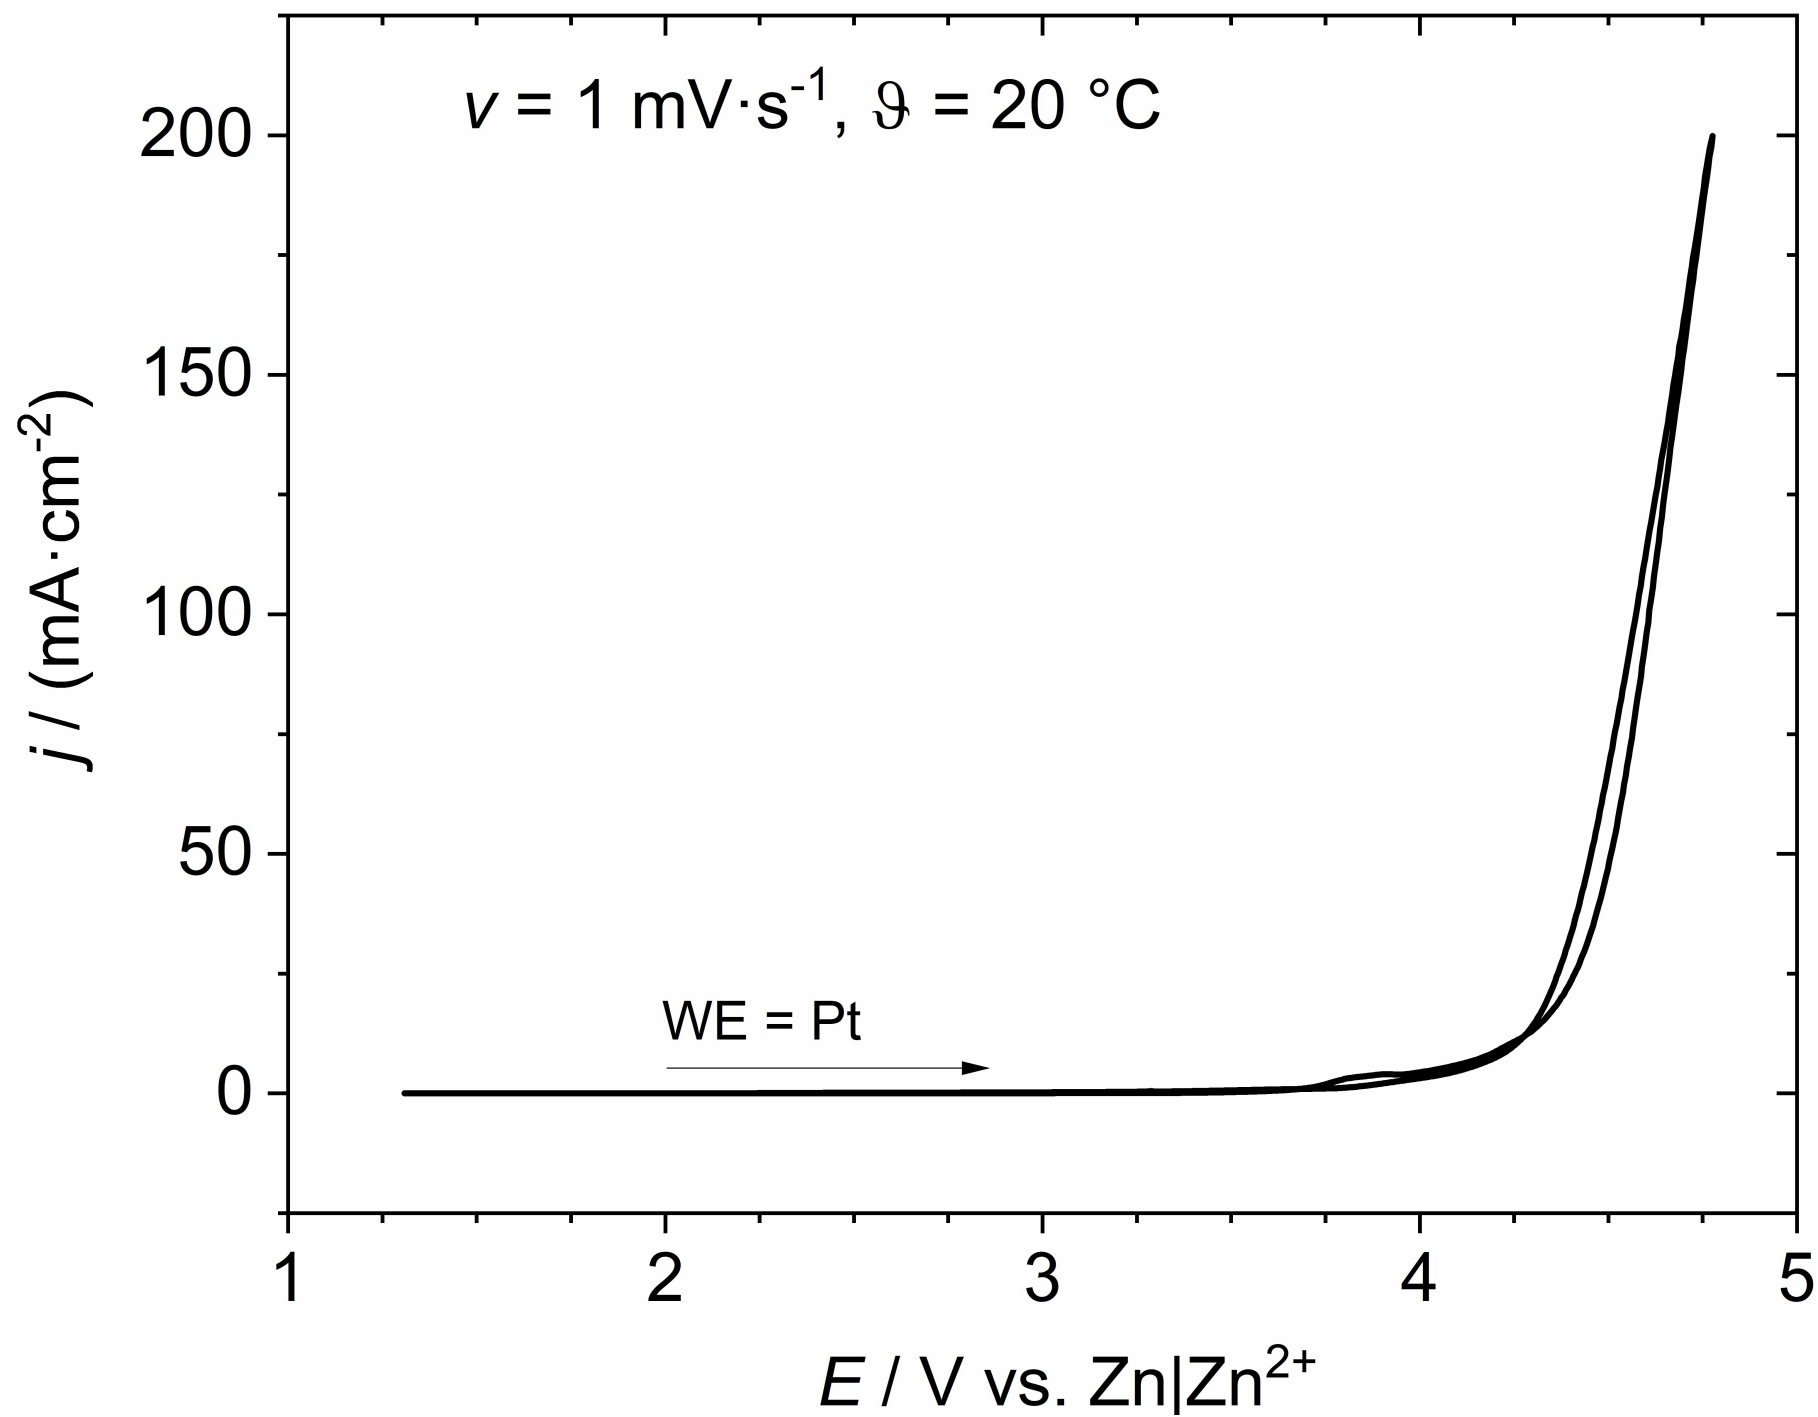

Supplement: d4ya00134f6.pdf [file d4ya00134f6.pdf]

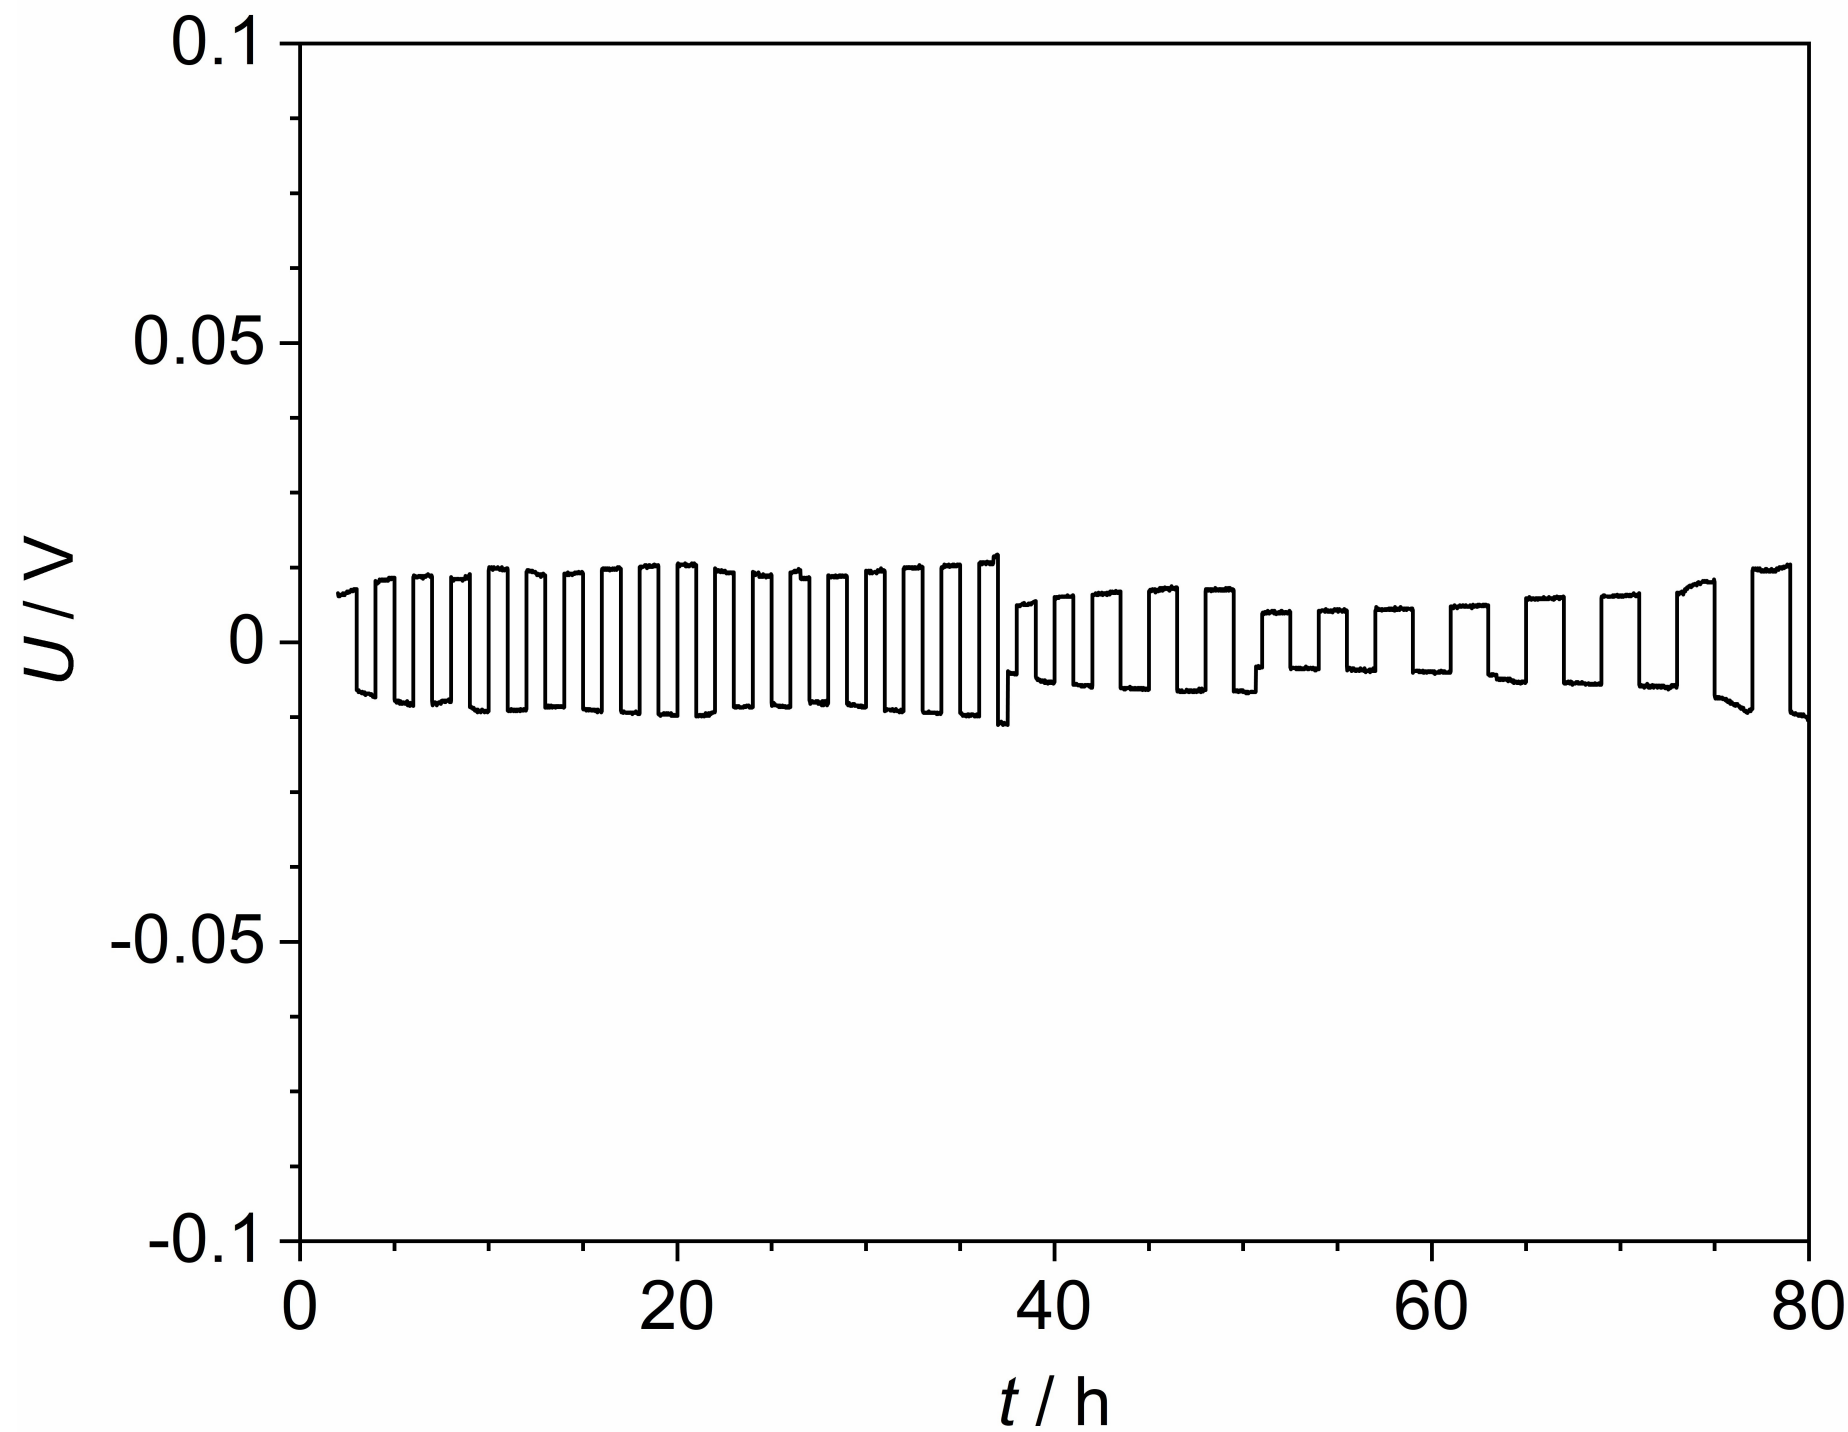

Supplement: d4ya00134f7.pdf [file d4ya00134f7.pdf]

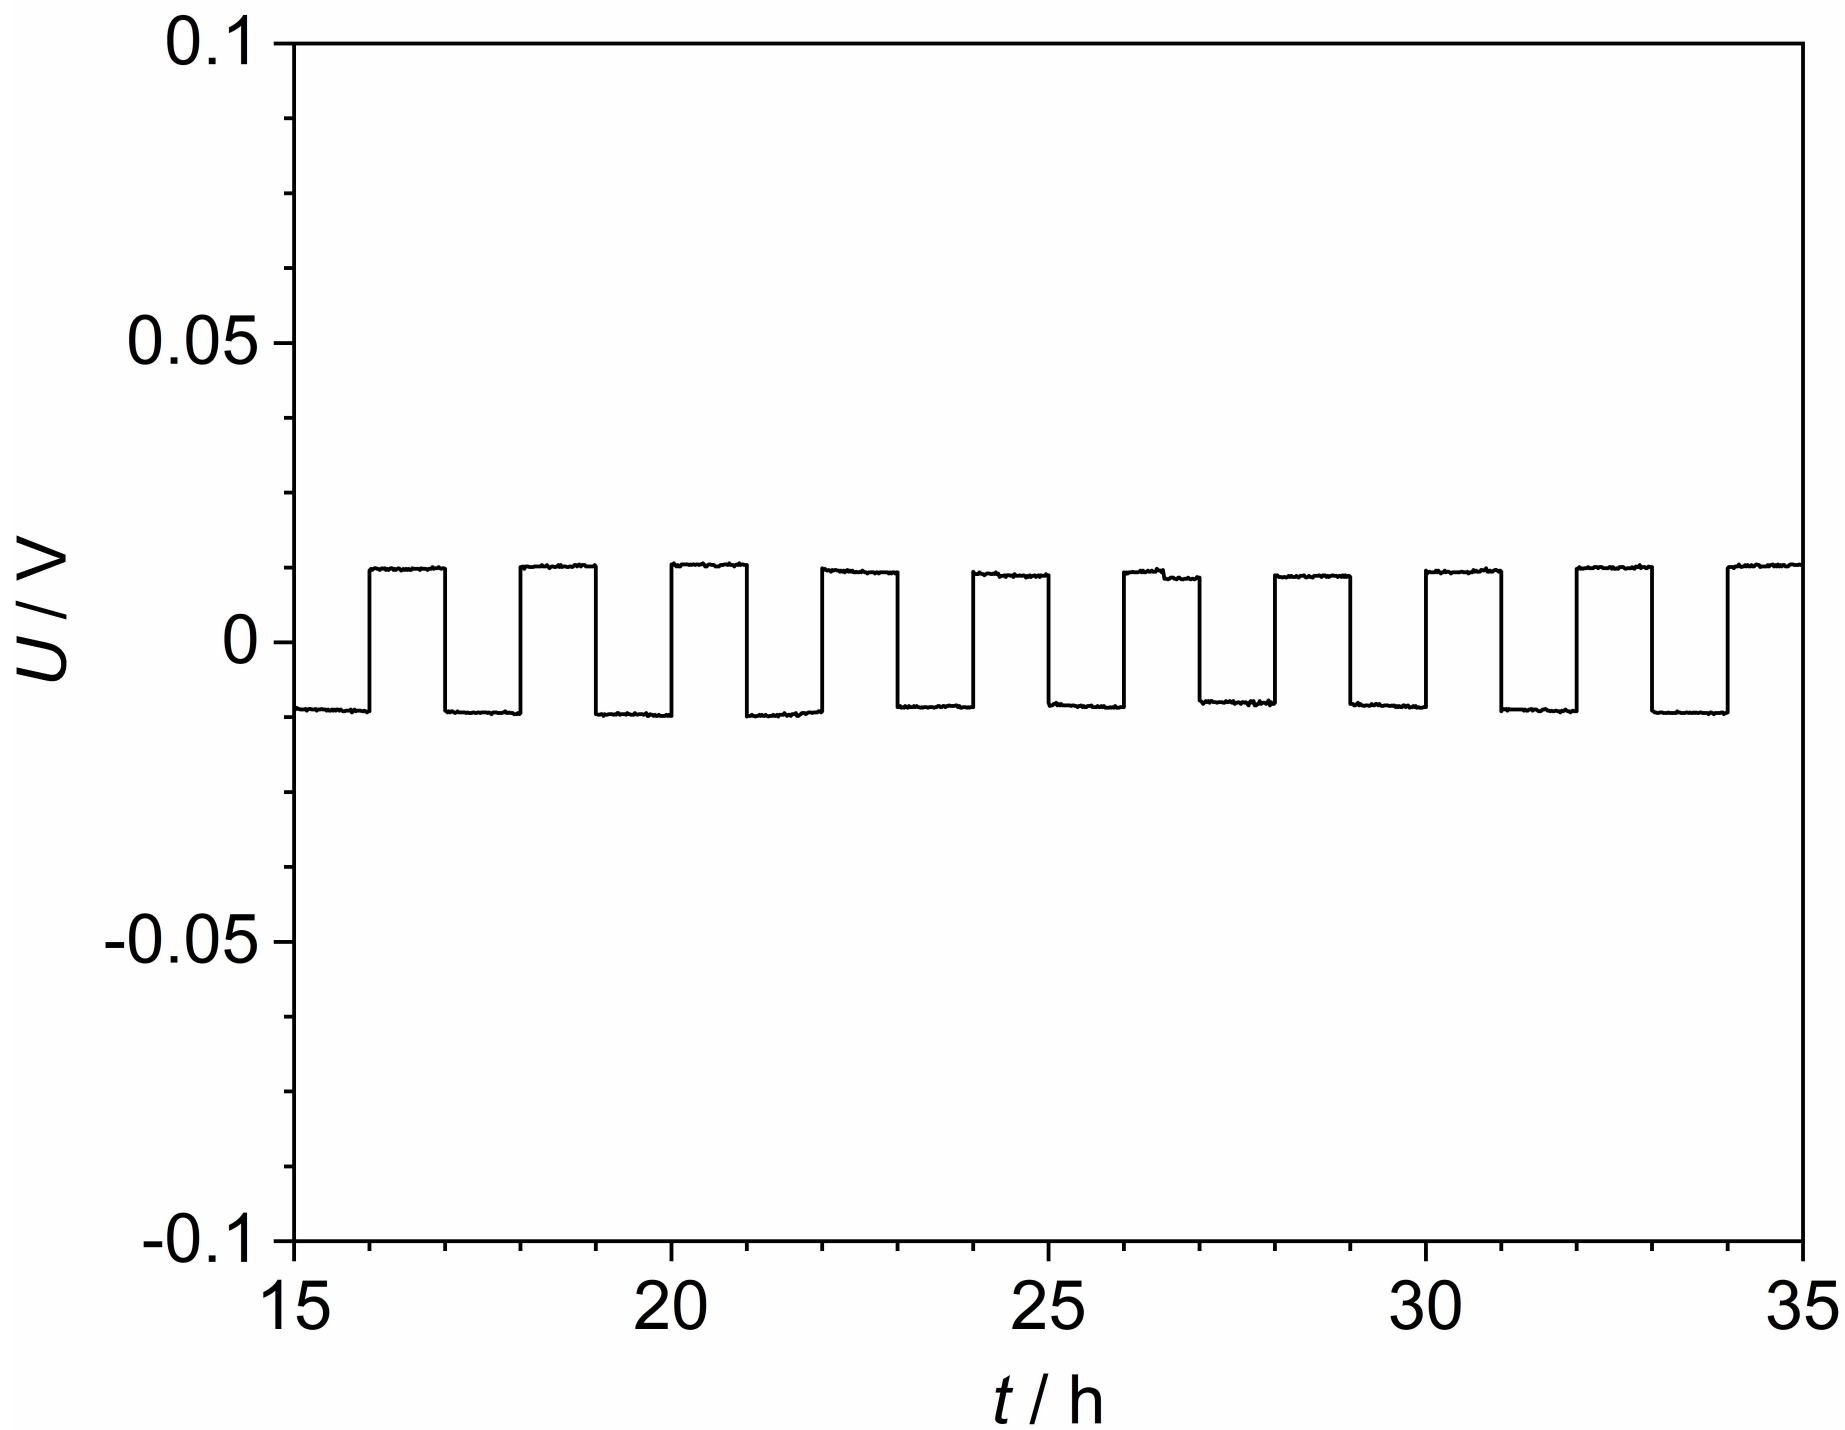

Supplement: d4ya00134f8.pdf [file d4ya00134f8.pdf]

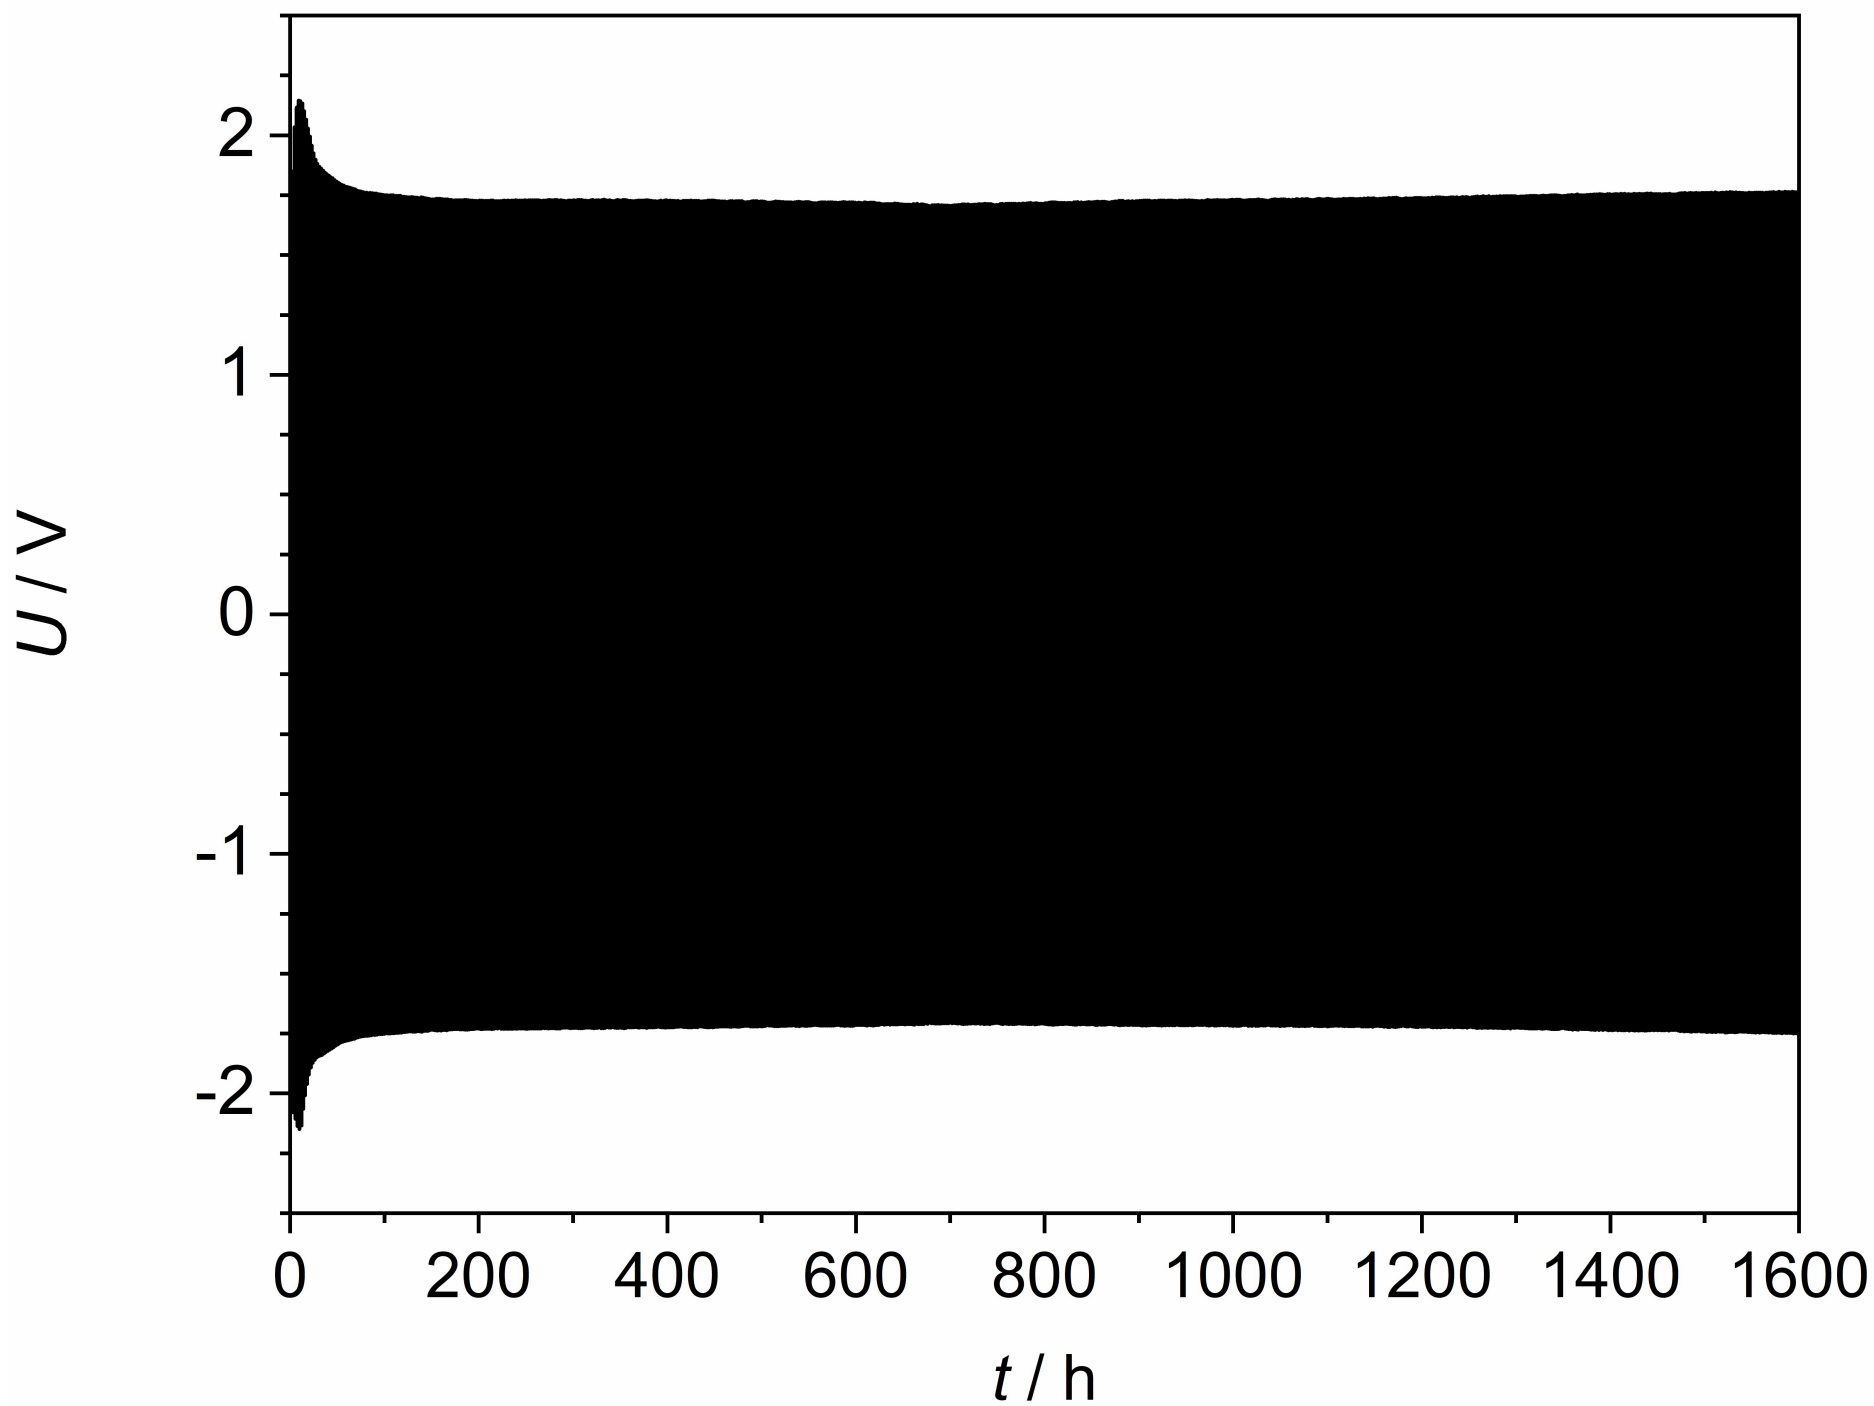

Supplement: d4ya00134f9.pdf [file d4ya00134f9.pdf]
